# Supplementary material for: So Johnny's Been Bad. What Else Is New?.
Source: MDPI journal article supplement (doi:10.3390/ph16081176), 1996-01-01
Supplement: s1 [file s1]

**Supplementary Table S2.** Results of sensitivity analysis after removal of studies in which confidence interval does not overlap with the confidence interval of the pooled effect.

| Outcomes                                                          | RCT | Sample size | RR or SMD | 95% CI       | <i>I</i> <sup>2</sup> value | Z value | P value   |
|-------------------------------------------------------------------|-----|-------------|-----------|--------------|-----------------------------|---------|-----------|
| <b>HM combined with antidepressants vs. antidepressants alone</b> |     |             |           |              |                             |         |           |
| 5-HT                                                              | 9   | 1152        | SMD 1.26  | 0.87, 1.66   | 89%                         | 6.29    | < 0.0001  |
| NE                                                                | 6   | 954         | SMD 1.20  | 0.84, 1.56   | 84%                         | 6.51    | < 0.0001  |
| BDNF                                                              | 9   | 798         | SMD 1.11  | 0.84, 1.39   | 69%                         | 7.93    | < 0.0001  |
| CORT                                                              | 4   | 224         | SMD -3.08 | -3.48,-2.67  | 52%                         | 14.80   | < 0.00001 |
| HAMD                                                              | 12  | 1183        | SMD -1.45 | -1.75, -1.14 | 81%                         | 9.33    | < 0.00001 |

5-HT = 5-hydroxytryptamine (Serotonin); BDNF = Brain Derived Neurotrophic Factor; CI = Confidence Interval; CORT = Cortisol; HAMD = Hamilton Depression Scale; NE = Norepinephrine; RCT = Randomized Controlled Trials; RR = Risk Ratio; SMD = Standardized Mean Difference
