# Supplementary material for: So Johnny's Been Bad. What Else Is New?.
Source: MDPI journal article supplement (doi:10.3390/ph16081176), 1996-01-01
Supplement: s1 [file s1]

**Supplementary Figure S1-6. Forest plot for comparison of HAMD score and adverse effective rate.**

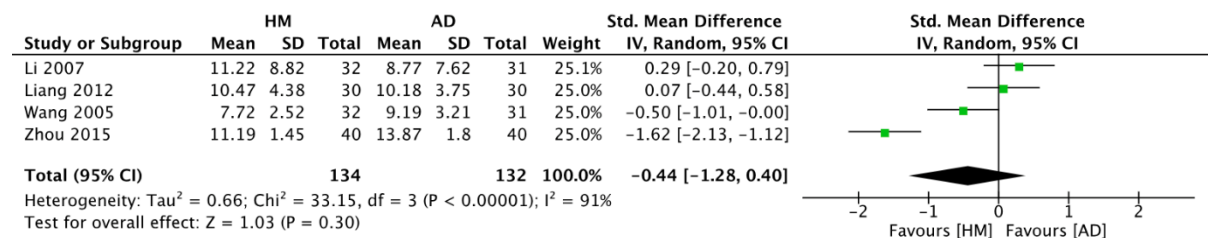

**Supplementary Figure S1.** Forest plot of the comparison between herbal medicine versus antidepressant assessing HAMD. AD, antidepressant; HAMD, Hamilton Depression Scale; HM, herbal medicine.

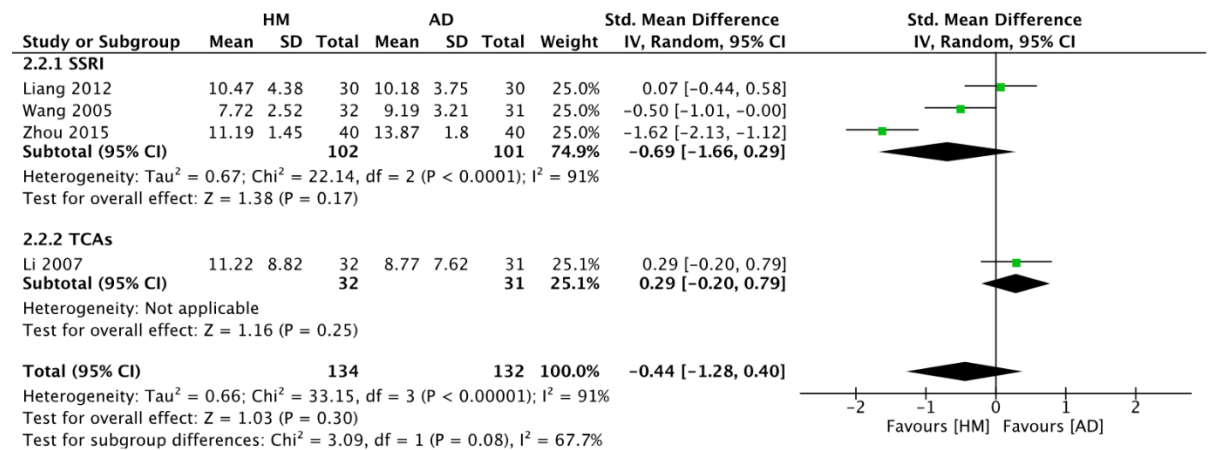

**Supplementary Figure S2.** Forest plot of the comparison between herbal medicine versus antidepressant assessing HAMD, Subgroup analysis according to type of AD. AD, antidepressant; HAMD, Hamilton Depression Scale; HM, herbal medicine.

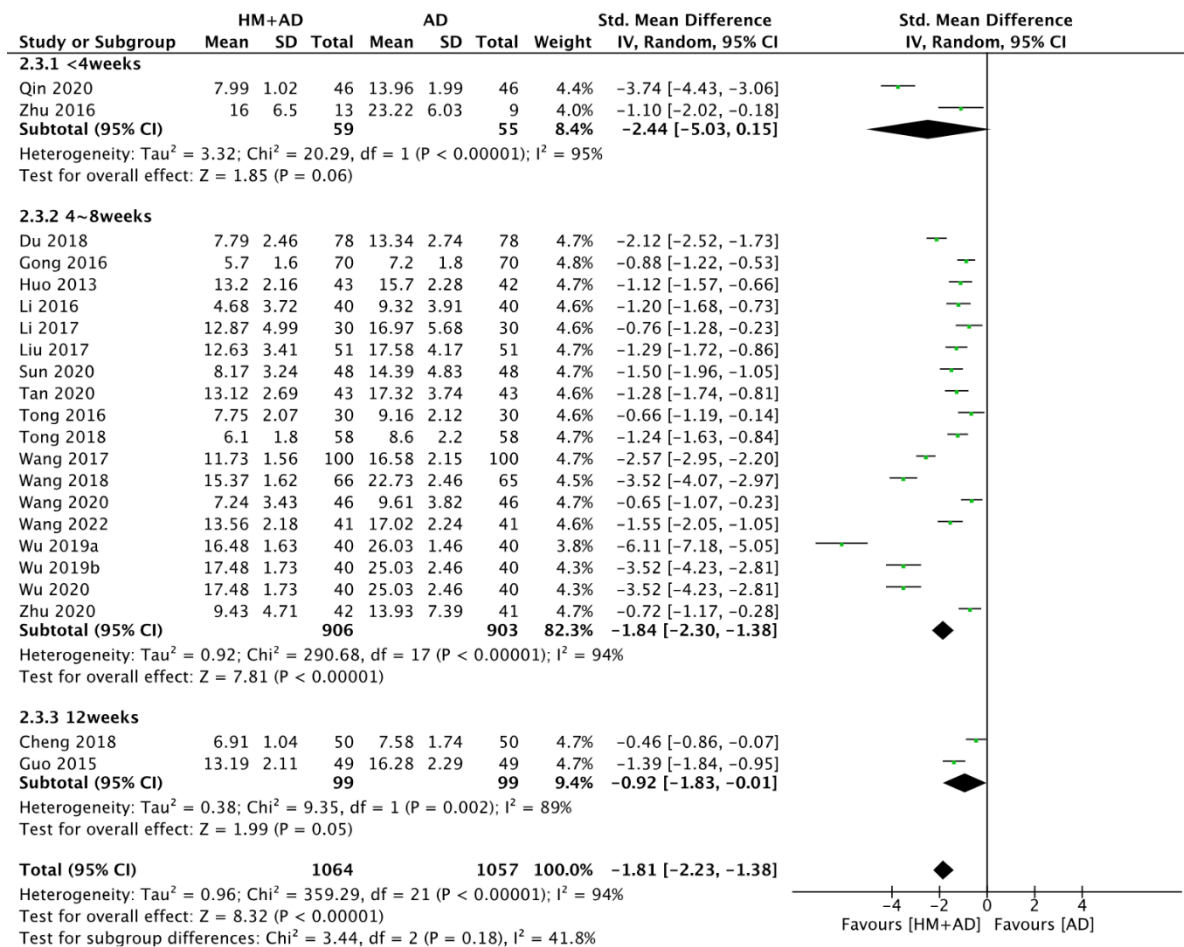

**Supplementary Figure S3.** Forest plot of the comparison between herbal medicine plus antidepressant versus antidepressant alone assessing HAMD, Subgroup analysis according to duration of treatment. AD, antidepressant; HAMD, Hamilton Depression Scale; HM, herbal medicine.

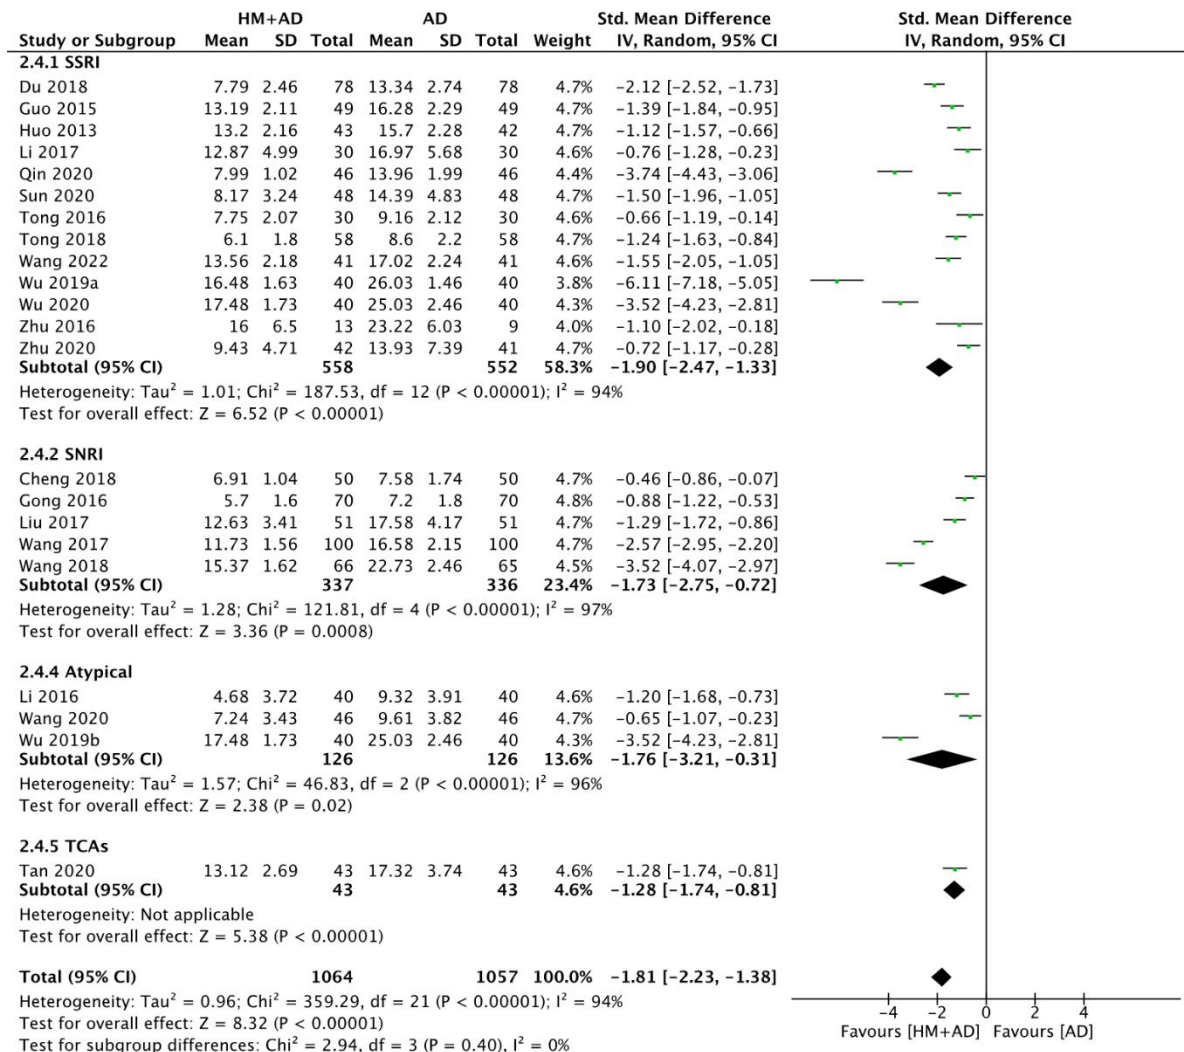

**Supplementary Figure S4.** Forest plot of the comparison between herbal medicine plus antidepressant versus antidepressant alone assessing HAMD, Subgroup analysis according to type of AD. AD, antidepressant; HAMD, Hamilton Depression Scale; HM, herbal medicine.

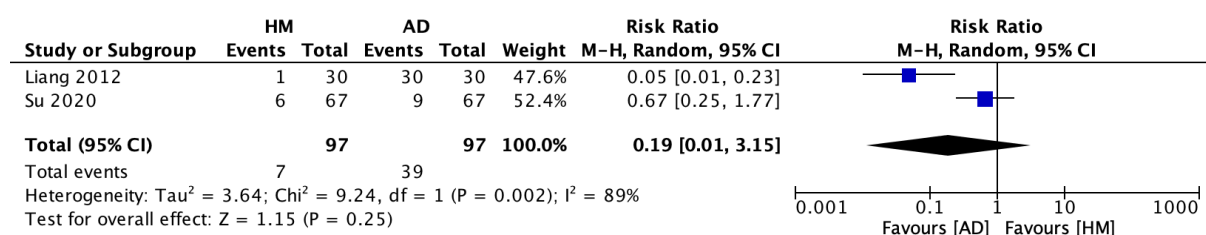

**Supplementary Figure S5.** Forest plot of the comparison between herbal medicine versus antidepressant assessing adverse effective rate.

AD, antidepressant; HM, herbal medicine.

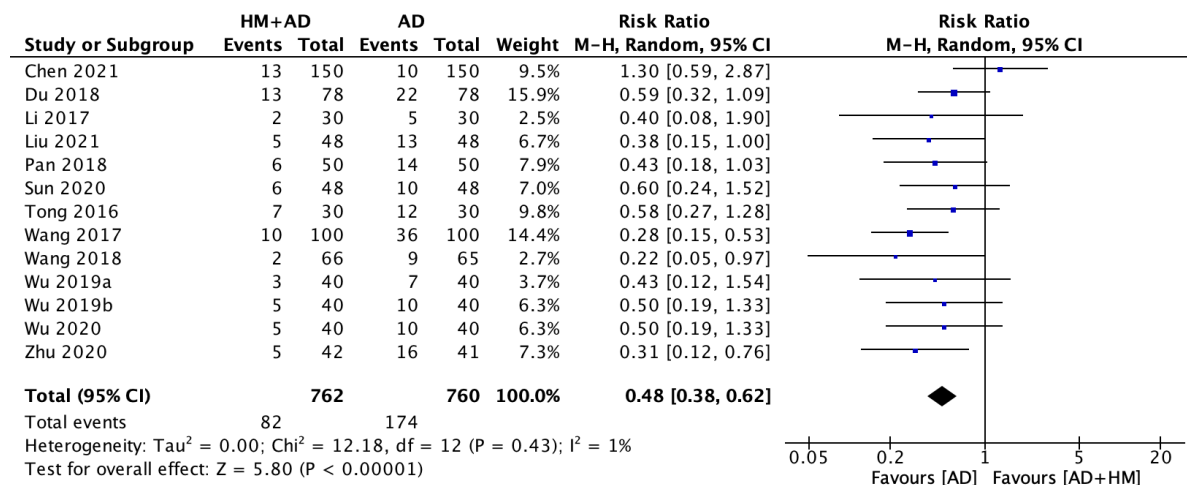

**Supplementary Figure S6.** Forest plot of the comparison between herbal medicine plus antidepressant versus antidepressant alone assessing adverse effective rate. AD, antidepressant; HM, herbal medicine.
