# Supplementary material for: So Johnny's Been Bad. What Else Is New?.
Source: MDPI journal article supplement (doi:10.3390/ph16081176), 1996-01-01
Supplement: s1 [file s1]

**Supplementary Table S1. Characteristics of Included Study**

| First Author (year) | Sample size (male/female)        | Mean age (years)                   | Diagnostic tool (severity criteria for inclusion) | Treatment intervention <sup>‡</sup> (A)                          | Control intervention (B) | Duration (F/U) | Outcome measurements and results                                              |
|---------------------|----------------------------------|------------------------------------|---------------------------------------------------|------------------------------------------------------------------|--------------------------|----------------|-------------------------------------------------------------------------------|
| Li (26) (2016)      | (A) 40 (22/18)<br>(B) 40 (19/21) | (A) 28.72±8.79<br>(B) 27.78±8.56   | CCMD-3 (HAMD ≥8)                                  | Chaifu Jieyu prescription bid & Mirtazapine 10–30 mg qd          | Mirtazapine 10–30 mg qd  | 8 weeks        | ① 5-HT: (A)>(B)*<br>② NE: (A)>(B)*<br>③ HAMD: (A)>(B)*                        |
| Wu (27) (2020)      | (A) 40 (20/20)<br>(B) 40 (20/20) | (A) 38.96±5.36<br>(B) 40.41±1.97   | CCMD-3                                            | Chaihu Longgu Muli decoction 200 mL bid & Paroxetine 30 mg qd    | Paroxetine 30 mg qd      | 4 weeks        | ① 5-HT: (A)>(B)*<br>② CORT: (A)>(B)*<br>③ HAMD: (A)>(B)*<br>④ SDS: (A)>(B)*   |
| Zhu (28) (2020)     | (A) 42 (18/24)<br>(B) 41 (12/29) | (A) 52.17±12.69<br>(B) 48.98±12.21 | CCMD-3 & DSM5 (35≥ HAMD 24≥20)                    | Chaihu Longgu Muli decoction 150 mL bid & Escitalopram 10 mg bid | Escitalopram 10 mg bid   | 8 weeks        | ① BDNF: (A)>(B)*<br>② HAMD: (A)>(B)*<br>③ HAMD ER: (A)>(B)*                   |
| Liu (29) (2017)     | (A) 51 (19/32)<br>(B) 51 (20/31) | (A) 39.67±5.60<br>(B) 38.91±5.78   | CCMD-3                                            | Chaihu Shugan powder 300 mL & Venlafaxine 75–150 mg qd           | Venlafaxine 75–150 mg qd | 8 weeks        | ① 5-HT: (A)>(B)*<br>② HAMD: (A)>(B)*<br>③ HAMD ER: (A)>(B)*                   |
| Pan (30) (2018)     | (A) 50 (35/15)<br>(B) 50 (37/13) | (A) 40.19±4.52<br>(B) 40.53±4.60   | CCMD-3 (HAMD 17≥17)                               | Chaihu Shugan powder 150 mL bid & Paroxetine 20 mg qd            | Paroxetine 20 mg qd      | 4 weeks        | ① 5-HT: (A)>(B)*<br>② HAMD ER: (A)>(B)*                                       |
| Sun (31) (2020)     | (A) 48 (21/27)<br>(B) 48 (22/26) | (A) 39.86±7.74<br>(B) 39.63±7.51   | CCMD-3 (HAMD 17≥17)                               | Chaihu Shugan powder 150 mL bid & Escitalopram 20 mg qd          | Escitalopram 20 mg qd    | 8 weeks        | ① 5-HT: (A)>(B)*<br>② NE: (A)>(B)*<br>③ HAMD: (A)>(B)*<br>④ HAMD ER: (A)>(B)* |
| Tan (32) (2020)     | (A) 43 (21/22)<br>(B) 43 (20/23) | (A) 48.45±10.61<br>(B) 49.16±10.13 | CCMD-3                                            | Chaihu Shugan powder 250 mL bid & Doxepin 25–50 mg bid           | Doxepin 25–50 mg bid     | 8 weeks        | ① 5-HT: (A)>(B)*<br>② HAMD: (A)>(B)*<br>③ SDS: (A)>(B)*                       |

| First Author (year) | Sample size (male/female)        | Mean age (years)                   | Diagnostic tool (severity criteria for inclusion) | Treatment intervention† (A)                                 | Control intervention (B)                                                                                                                         | Duration (F/U) | Outcome measurements and results                                                                                                                                                                                                                                         |
|---------------------|----------------------------------|------------------------------------|---------------------------------------------------|-------------------------------------------------------------|--------------------------------------------------------------------------------------------------------------------------------------------------|----------------|--------------------------------------------------------------------------------------------------------------------------------------------------------------------------------------------------------------------------------------------------------------------------|
| Li (23) (2007)      | (A) 32 (15/17)<br>(B) 31 (14/17) | (A) 39.7±11.9<br>(B) 38.6±13.6     | CCMD-3 & ICD-10 (HAMD 17≥20)                      | Danzhi Xiaoyao powder 12 g bid & placebo Maprotiline        | Maprotiline 25–125 mg qd (1 <sup>st</sup> week)<br>avg. 200 mg max 250 mg qd (2 <sup>nd</sup> –6 <sup>th</sup> week)<br>& placebo Danchisoyo-san | 6 weeks        | ① 5-HT: NS<br>② BDNF: NS<br>③ CORT: (A)>(B)*<br>④ HAMD: NS                                                                                                                                                                                                               |
| Zhou (33) (2015)    | (A) 40 (15/25)<br>(B) 40 (18/22) | (A) 36±5.5<br>(B) 36±5.3           | CCMD-3 (35≥ HAMD 24≥18)                           | Fuyang Shugan Juanpi prescription 200 mL tid                | Fluoxetine 20 mg qd                                                                                                                              | 6 weeks        | ① 5-HT: NS<br>② HAMD: NS                                                                                                                                                                                                                                                 |
| Liang (34) (2012)   | (A) 30 (23/7)<br>(B) 30 (22/8)   | (A) 38.00±11.47<br>(B) 38.72±12.38 | CCMD-3 (HAMD 17≥17)                               | Guipi decoction 200 mL bid                                  | Fluoxetine 20 mg qd                                                                                                                              | 6 weeks        | ① 5-HT: NS<br>② HAMD: NS<br>③ HAMD ER: NS<br>④ MADRS: (A)>(B)*                                                                                                                                                                                                           |
| Qin (35) (2020)     | (A) 46<br>(B) 46                 | NR                                 | ICD-10 (35≥ HAMD ≥20)                             | Jiawei Chaihu decoction 200 mL bid & Paroxetine 20 mg qd    | Paroxetine 20 mg qd                                                                                                                              | 3 weeks        | ① 5-HT: (A)>(B)*<br>② 5-HIAA: (A)>(B)*<br>③ NE: (A)>(B)*<br>④ BDNF: (A)>(B)*<br>⑤ NGF: (A)>(B)*<br>⑥ HAMD: (A)>(B)*                                                                                                                                                      |
| Liu (36) (2021)     | (A) 48 (15/33)<br>(B) 48 (12/36) | (A) 31.75±7.61<br>(B) 31.63±7.50   | CCMD-3                                            | Jiawei Chaihu decoction 200 mL bid & Paroxetine 20–50 mg qd | Paroxetine 20–50 mg qd                                                                                                                           | 24 weeks       | ① 5-HT: (A)>(B)*<br>② 5-HIAA: (A)>(B)*<br>③ NE: (A)>(B)*<br>④ BDNF: (A)>(B)*<br>⑤ NGF: (A)>(B)*<br>⑥ HAMD RETARDATION: (A)>(B)*<br>⑦ HAMD INSOMNIA: (A)>(B)*<br>⑧ HAMD SOMATIC ANXIETY: (A)>(B)*<br>⑨ HAMD PSYCHIC ANXIETY : (A)>(B)*<br>⑩ HAMD DEPRESSED MOOD: (A)>(B)* |

| First Author (year) | Sample size (male/female)        | Mean age (years)                 | Diagnostic tool (severity criteria for inclusion) | Treatment intervention† (A)                                        | Control intervention (B)                                                                                      | Duration (F/U) | Outcome measurements and results                                                |
|---------------------|----------------------------------|----------------------------------|---------------------------------------------------|--------------------------------------------------------------------|---------------------------------------------------------------------------------------------------------------|----------------|---------------------------------------------------------------------------------|
| Tong (37) (2016)    | (A) 30 (18/12)<br>(B) 30 (17/13) | (A) 35.1±2.5<br>(B) 34.6±2.1     | ICD-10                                            | Jiawei Xiaoyao powder bid                                          | Paroxetine<br>20 mg qd (1st week)<br>30 mg qd (2nd week)<br>40 mg qd (3rd week)<br>& placebo Gamisoyo-san bid | 8 weeks        | ① BDNF: (A)>(B)*<br>② HAMD: (A)>(B)*<br>③ HAMD ER: (A)>(B)*                     |
| Tong (38) (2018)    | (A) 58<br>(B) 58                 | (A) 37.42±3.75<br>(B) 37.11±3.39 | CCMD-3<br>(HAMD >17)                              | Jiawei Xiaoyao powder bid & Fluoxetine 20 mg qd                    | Fluoxetine 20 mg qd                                                                                           | 8 weeks        | ① BDNF: (A)>(B)*<br>② HAMD: (A)>(B)*<br>③ HAMD ER: (A)>(B)*                     |
| Wang (39) (2022)    | (A) 41 (17/24)<br>(B) 41 (16/25) | (A) 35.28±4.42<br>(B) 35.21±4.36 | ICD-10<br>(HAMD 17>17)                            | Jiawei Xiaoyao powder 150 mL bid & Fluoxetine 20 mg qd             | Fluoxetine 20 mg qd                                                                                           | 8 weeks        | ① BDNF: (A)>(B)*<br>② HAMD: (A)>(B)*<br>③ HAMD ER: (A)>(B)*<br>④ TESS: (A)>(B)* |
| Huo (40) (2013)     | (A) 43 (18/25)<br>(B) 42 (17/25) | (A) 41.2±7.35<br>(B) 42.3±7.52   | CCMD-3<br>(35≥ HAMD ≥7)                           | Jieyu Anshen decoction bid & Paroxetine 20–50 mg qd                | Paroxetine 20–50 mg qd                                                                                        | 6 weeks        | ① BDNF: (A)>(B)*<br>② HAMD: (A)>(B)*<br>③ HAMD ER: (A)>(B)*                     |
| Guo (41) (2015)     | (A) 49 (19/30)<br>(B) 49 (20/29) | (A) 47.11±8.65<br>(B) 46.85±8.71 | CCMD-3<br>(35≥ HAMD ≥7)                           | Jieyu Anshen Dingzhi decoction 200 mL bid & Paroxetine 20–50 mg qd | Paroxetine 20–50 mg qd                                                                                        | 12 weeks       | ① BDNF: (A)>(B)*<br>② HAMD: (A)>(B)*                                            |
| Wang (42) (2020)    | (A) 46 (22/24)<br>(B) 46 (23/23) | (A) 40.4±8.8<br>(B) 42.1±9.2     | ICD-10<br>(HAMD ≥17)                              | Jieyu pill 4 g tid & Agomelatine 25–50 mg qd                       | Agomelatine 25–50 mg qd                                                                                       | 8 weeks        | ① BDNF: (A)>(B)*<br>② HAMD: (A)>(B)*<br>③ TESS: NS                              |
| Li (43) (2017)      | (A) 30 (12/18)<br>(B) 30 (11/19) | (A) 37.20±2.3<br>(B) 38.00±2.6   | DSM-5<br>(HAMD 24≥20)                             | Jinkui Shenqi pill 200 mL bid & Escitalopram 10–20 mg qd           | Escitalopram 10–20 mg qd                                                                                      | 6 weeks        | ① NGF: (A)>(B)*<br>② HAMD: (A)>(B)*<br>③ HAMD ER: (A)>(B)*                      |
| Wang (44) (2018)    | (A) 66 (43/23)<br>(B) 65 (40/25) | (A) 39.86±7.36<br>(B) 40.61±6.97 | CCMD-3                                            | Jiuwei Zhenxing granules 1 sachet (6 g) tid & Duloxetine 60 mg qd  | Duloxetine 60 mg qd                                                                                           | 6 weeks        | ① 5-HT: (A)>(B)*<br>② CORT: (A)>(B)*<br>③ HAMD: (A)>(B)*<br>④ SDS: (A)>(B)*     |

| First Author (year) | Sample size (male/female)          | Mean age (years)                   | Diagnostic tool (severity criteria for inclusion) | Treatment intervention† (A)                                                                | Control intervention (B)                              | Duration (F/U) | Outcome measurements and results                                                                                       |
|---------------------|------------------------------------|------------------------------------|---------------------------------------------------|--------------------------------------------------------------------------------------------|-------------------------------------------------------|----------------|------------------------------------------------------------------------------------------------------------------------|
| Wang (45) (2017)    | (A) 100 (58/42)<br>(B) 100 (61/39) | (A) 43.25±5.41<br>(B) 44.37±6.10   | CCMD-3                                            | Self-made herbal medicine 150 mL bid & Venlafaxine 75–150 mg qd                            | Venlafaxine 75–150 mg qd                              | 8 weeks        | ① 5-HT: (A)>(B)*<br>② DA: (A)>(B)*<br>③ NE: (A)>(B)*<br>④ HAMD: (A)>(B)*<br>⑤ HAMD ER: (A)>(B)*                        |
| Cheng (46) (2018)   | (A) 50<br>(B) 50                   | NR                                 | CCMD-3                                            | Self-made herbal medicine 150 mL bid & Sertraline 50–200 mg qd                             | Sertraline 50–200 mg qd                               | 12 weeks       | ① BDNF: (A)>(B)*<br>② HAMD: (A)>(B)*                                                                                   |
| Du (47) (2018)      | (A) 78 (38/40)<br>(B) 78 (34/44)   | (A) 33.78±9.84<br>(B) 34.25±9.96   | ICD-10                                            | Self-made herbal medicine 150 mL bid & Citalopram 10 mg qd (1st week) 20 mg qd (2nd week–) | Citalopram 10 mg qd (1st week) 20 mg qd (2nd week–)   | 6 weeks        | ① 5-HT: (A)<(B)*<br>② NE: (A)>(B)*<br>③ CORT: (A)>(B)*<br>④ HAMD: (A)>(B)*<br>⑤ HAMD ER: (A)>(B)*<br>⑥ MADRS: (A)>(B)* |
| Gong (48) (2016)    | (A) 70 (37/33)<br>(B) 70 (39/31)   | (A) 46.9±10.8<br>(B) 46.3±10.4     | CCMD-3                                            | Shugan Jieyu capsules (3 pills) & Duloxetine 30–60 mg qd                                   | Duloxetine 30–60 mg qd                                | 6 weeks        | ① BDNF: (A)>(B)*<br>② HAMD: (A)>(B)*                                                                                   |
| Chen (49) (2021)    | (A) 150 (69/81)<br>(B) 150 (72/78) | (A) 42.19±11.84<br>(B) 41.93±12.93 | CCMD-3 (HAMD ≥18)                                 | Shugan Jieyu capsules (3 pills) & Venlafaxine 75 mg qd (1st week) 150 mg qd (2nd week–)    | Venlafaxine 75 mg qd (1st week) 150 mg qd (2nd week–) | 8 weeks        | ① 5-HT: (A)>(B)*<br>② DA: (A)>(B)*<br>③ NE: (A)>(B)*<br>④ HAMD ER: (A)>(B)*                                            |
| Wu (50) (2019)a     | (A) 40 (20/20)<br>(B) 40 (20/20)   | (A) 38.96±5.36<br>(B) 40.41±1.97   | ICD-10                                            | Sini powder 100 mL bid & Paroxetine 20 mg qd                                               | Paroxetine 20 mg qd                                   | 8 weeks        | ① 5-HT: (A)>(B)*<br>② HAMD: (A)>(B)*<br>③ SDS: (A)>(B)*                                                                |
| Wu (51) (2019)b     | (A) 40 (20/20)<br>(B) 40 (20/20)   | (A) 38.96±5.36<br>(B) 40.41±1.97   | ICD-10                                            | Sini powder 100 mL bid & Mirtazapine 30 mg qd                                              | Mirtazapine 30 mg qd                                  | 8 weeks        | ① 5-HT: (A)>(B)*<br>② HAMD: (A)>(B)*<br>③ SDS: (A)>(B)*                                                                |
| Wang (52) (2005)    | (A) 32 (15/17)<br>(B) 31 (10/21)   | (A) 34.47±12.67<br>(B) 30.48±10.85 | CCMD-3                                            | Wangyou decoction 100 mL bid                                                               | Fluoxetine 20 mg qd                                   | 4 weeks        | ① 5-HIAA: NS<br>② HAMD: NS<br>③ HAMD ER: NS<br>④ MADRS: (A)>(B)*                                                       |

| First Author (year) | Sample size (male/female)        | Mean age (years)                  | Diagnostic tool (severity criteria for inclusion) | Treatment intervention† (A)                     | Control intervention (B)                          | Duration (F/U) | Outcome measurements and results                          |
|---------------------|----------------------------------|-----------------------------------|---------------------------------------------------|-------------------------------------------------|---------------------------------------------------|----------------|-----------------------------------------------------------|
| Su (53) (2020)      | (A) 67 (40/27)<br>(B) 67 (42/25) | (A) 43.5±3.9<br>(B) 43.9±3.7      | CCMD-3                                            | Xiaochaihu decoction 150 mL bid                 | Paroxetine or Fluoxetine 20 mg qd                 | 6 weeks        | ① 5-HT: (A)>(B)*<br>② NF: (A)>(B)*<br>③ HAMD ER: (A)>(B)* |
| Bo (54) (2022)      | (A) 53 (24/29)<br>(B) 53 (25/28) | (A) 40.12±5.12<br>(B) 40.61±5.36  | DSM-IV                                            | Xiaoyao pill 9 g bid & Venlafaxine 25–225 mg qd | Venlafaxine 25–225 mg qd                          | 8 weeks        | ① 5-HT: (A)>(B)*<br>② BDI: (A)>(B)*<br>③ BDI ER: (A)>(B)* |
| Zhu (55) (2016)     | (A) 13 (6/7)<br>(B) 9 (2/7)      | (A) 42.07±12.5<br>(B) 44.89±14.98 | CCMD-3<br>(HAMD 24>20)                            | Yueju Wan 23 g qd & Fluoxetine 20 mg qd         | Fluoxetine 20 mg qd & placebo Wolguk-hwan 23 g qd | 1 week         | ① BDNF: NS<br>② HAMD: (A)>(B)*<br>③ SDS: NS               |
|                     | (A) 10 (1/9)<br>(B) 9 (2/7)      | (A) 52.7±9.7<br>(B) 44.89±14.98   | CCMD-3<br>(HAMD 24>20)                            | Yueju Wan 18 g qd & Fluoxetine 20 mg qd         | Fluoxetine 20 mg qd & placebo Wolguk-hwan 23 g qd | 1 week         | ① BDNF: NS<br>② HAMD: NS<br>③ SDS: NS                     |

Note: “\*” indicates a significant difference,  $p<0.05$ . ‘NS’ indicates no significant difference,  $p>0.05$ . ‘NR’ = not reported. (A) = Treatment intervention; (B) = Control intervention.

5-HIAA = 5-hydroxyindoleacetic acid; 5-HT = 5-hydroxytryptamine (Serotonin); BDI = Beck Depression Inventory; BDNF = Brain Derived Neurotrophic Factor; CCMD = Chinese Classification of Mental Disorders; DSM = Diagnostic Statistical Manual; CORT = Cortisol; DA = Dopamine; ER = Effective Rate; HAMD = Hamilton Depression Scale; ICD = International Statistical Classification of Disease; MADRS = Montgomery–Åsberg Depression Rating Scale; NE = Norepinephrine; NF = Neurotrophic Factor; NGF = Nerve growth factor; SDS = Self-Rating Depression Scale; TESS = Treatment-Emergent Signs and Symptom
