# Supplementary material for: Neuroendocrine Biomarkers of Herbal Medicine for Major Depressive Disorder: A Systematic Review and Meta-Analysis
Source: Pharmaceuticals (Basel). 2023 Aug 18;16(8):1176. doi: 10.3390/ph16081176 (PMC10458856; doi:10.3390/ph16081176)
Supplement: Supplementary file 1 [file pharmaceuticals-16-01176-s001.zip]

Archive with 4 entries (4 files):
- Supplementary Figure S1-6. Forest plot for comparison of HAMD score and adverse effective rate.pdf
- Supplementary File S1. Search terms used in each database-proof.pdf
- Supplementary table S1. Characteristics of included study.pdf
- Supplementary table S2. Results of sensitivity analysis.pdf
